# Supplementary material for: Novel index to comprehensively evaluate air cleanliness: the Clean aIr Index (CII)
Source: Copernicus journal article supplement (doi:10.5194/gc-3-233-2020), 2020-08-26
Supplement: Supplementary file 1 [file gc-3-233-2020-supplement.zip]

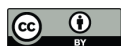

## *Supplement of*

# **Novel index to comprehensively evaluate air cleanliness: the Clean aIr Index (CII)**

**Tomohiro O. Sato et al.**

*Correspondence to:* Yasuko Kasai ([ykasai@nict.go.jp](mailto:ykasai@nict.go.jp))

- [gc-3-233-2020-supplement-title-page.pdf](#)
- [cii\\_supplement](#)
  - [cii\\_map\\_201404.gif](#)
  - [cii\\_map\\_201405.gif](#)
  - [cii\\_map\\_201406.gif](#)
  - [cii\\_map\\_201407.gif](#)
  - [cii\\_map\\_201408.gif](#)
  - [cii\\_map\\_201409.gif](#)
  - [cii\\_map\\_201410.gif](#)
  - [cii\\_map\\_201411.gif](#)
  - [cii\\_map\\_201412.gif](#)
  - [cii\\_map\\_201501.gif](#)
  - [cii\\_map\\_201502.gif](#)
  - [cii\\_map\\_201503.gif](#)
  - [cii\\_map\\_201504.gif](#)
  - [cii\\_map\\_201505.gif](#)
  - [cii\\_map\\_201506.gif](#)
  - [cii\\_map\\_201507.gif](#)
  - [cii\\_map\\_201508.gif](#)
  - [cii\\_map\\_201509.gif](#)
  - [cii\\_map\\_201510.gif](#)
  - [cii\\_map\\_201511.gif](#)
  - [cii\\_map\\_201512.gif](#)
  - [cii\\_map\\_201601.gif](#)

- [cii\\_map\\_201602.gif](#)
- [cii\\_map\\_201603.gif](#)
- [cii\\_map\\_201604.gif](#)
- [cii\\_map\\_201605.gif](#)
- [cii\\_map\\_201606.gif](#)
- [cii\\_map\\_201607.gif](#)
- [cii\\_map\\_201608.gif](#)
- [cii\\_map\\_201609.gif](#)
- [cii\\_map\\_201610.gif](#)
- [cii\\_map\\_201611.gif](#)
- [cii\\_map\\_201612.gif](#)
- [cii\\_map\\_201701.gif](#)
- [cii\\_map\\_201702.gif](#)
- [cii\\_map\\_201703.gif](#)

The copyright of individual parts of the supplement might differ from the CC BY 4.0 License.
